# Supplementary material for: Curing piglets from diarrhea and preparation of a healthy microbiome with Bacillus treatment for industrial animal breeding
Source: PubMed Central journal article supplement (PMC7656456; doi:10.1038/s41598-020-75207-1), 2020-11-10
Supplement: 41598_2020_75207_MOESM1_ESM.pdf [file 41598_2020_75207_MOESM1_ESM.pdf]

"Curing piglets from diarrhea and  
preparation of a healthy microbiome  
with Bacillus treatment  
for industrial animal breeding"

Shousong Yue, Zhentian Li, Fuli Hu, and Jean-François Picimbon

**A.**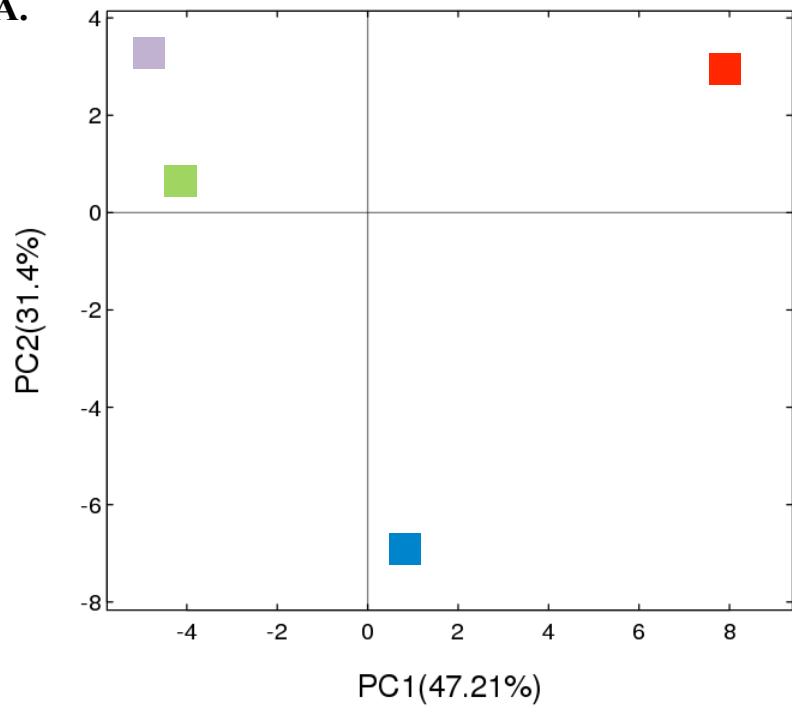**B.**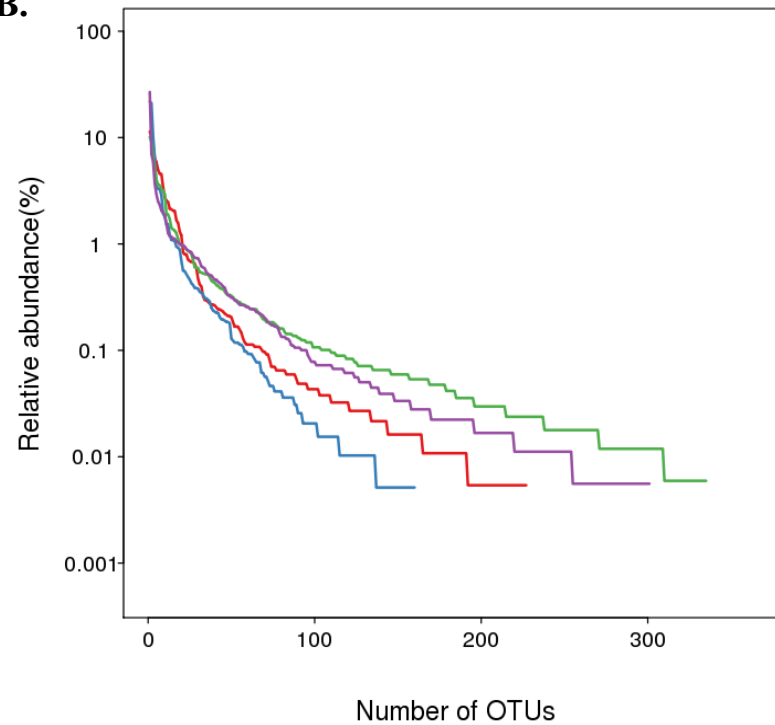

**Antibiotics**   **Diarrhea**   **Microecosystem**   **Normal**
