# Supplementary material for: Curing piglets from diarrhea and preparation of a healthy microbiome with Bacillus treatment for industrial animal breeding
Source: PubMed Central journal article supplement (PMC7656456; doi:10.1038/s41598-020-75207-1), 2020-11-10

Antibiotics Diarrhea Microecosystem Normal

A.

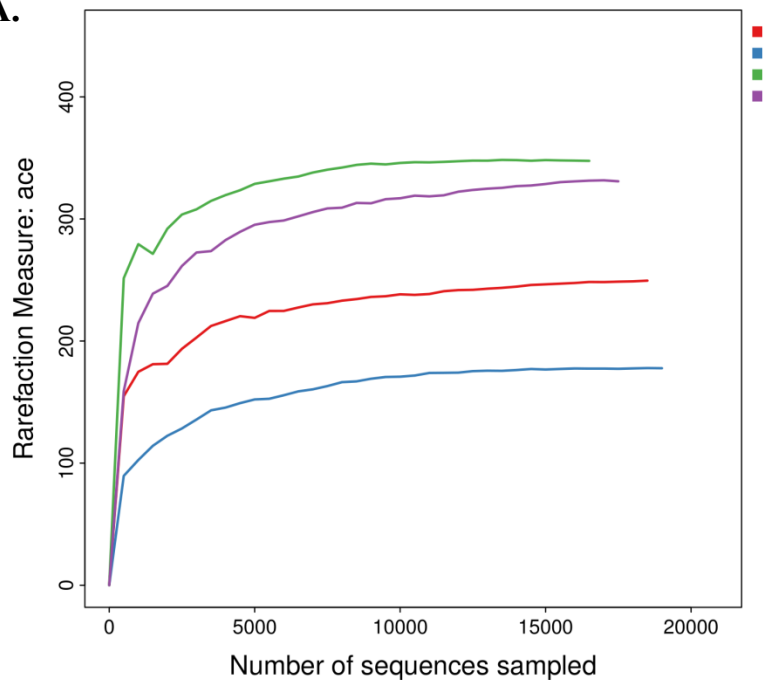

B.

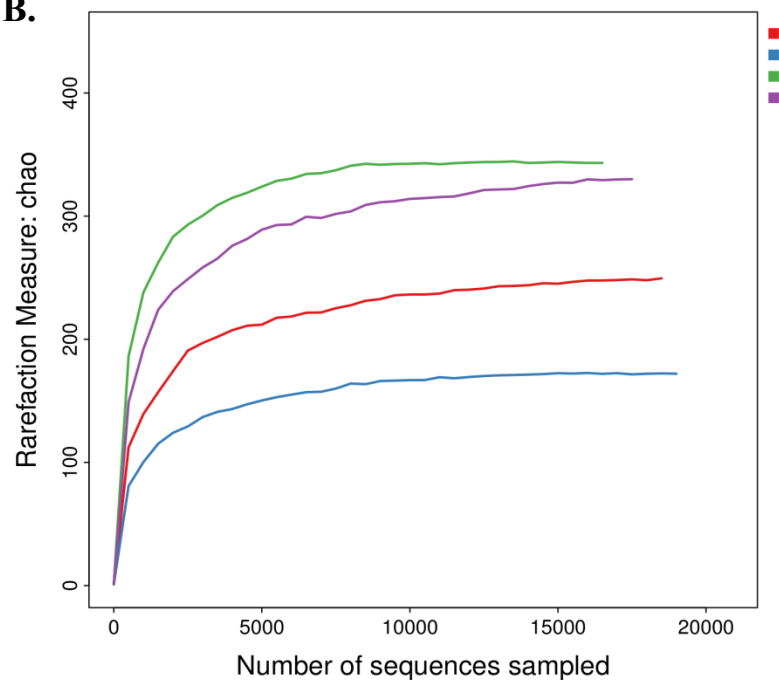

C.

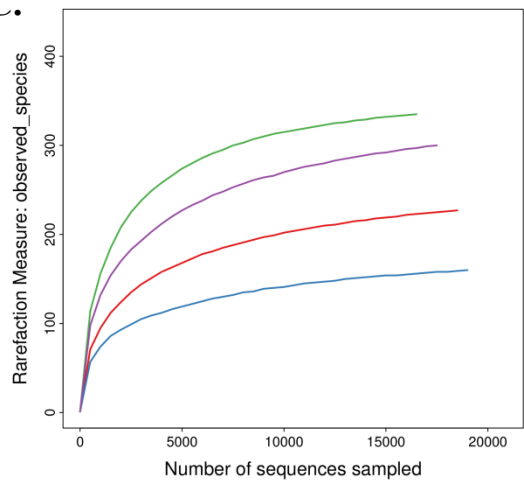

D.

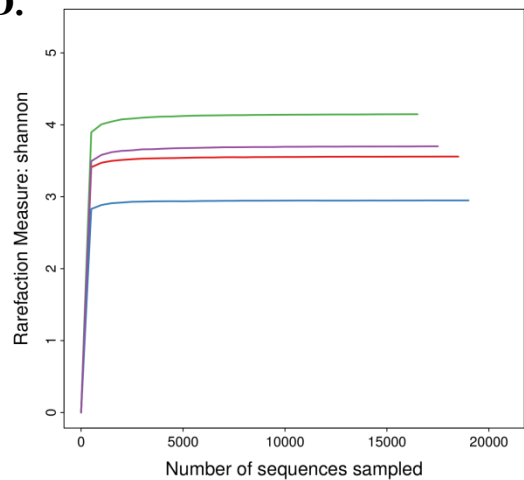

E.

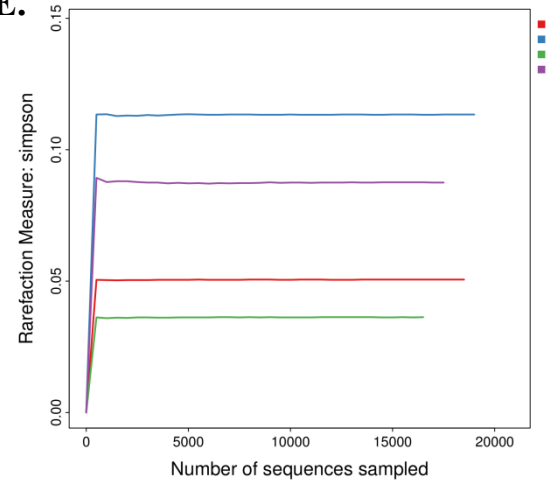

Supplement: 41598_2020_75207_MOESM3_ESM.pdf [file 41598_2020_75207_MOESM3_ESM.pdf]
