# Supplementary material for: Curing piglets from diarrhea and preparation of a healthy microbiome with Bacillus treatment for industrial animal breeding
Source: PubMed Central journal article supplement (PMC7656456; doi:10.1038/s41598-020-75207-1), 2020-11-10
Supplement: 41598_2020_75207_MOESM4_ESM.pdf [file 41598_2020_75207_MOESM4_ESM.pdf]

**A**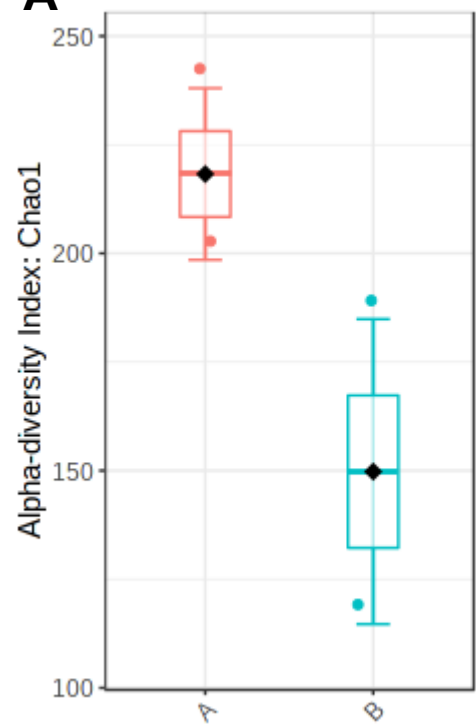

Alpha-diversity Index: ACE

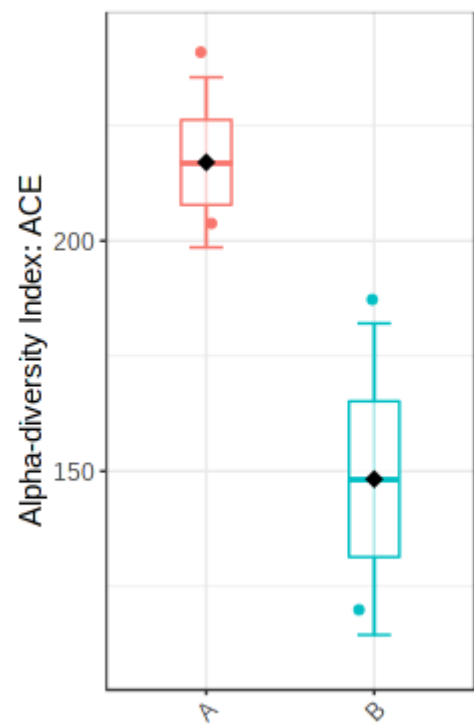

CLASS

A

B

**B**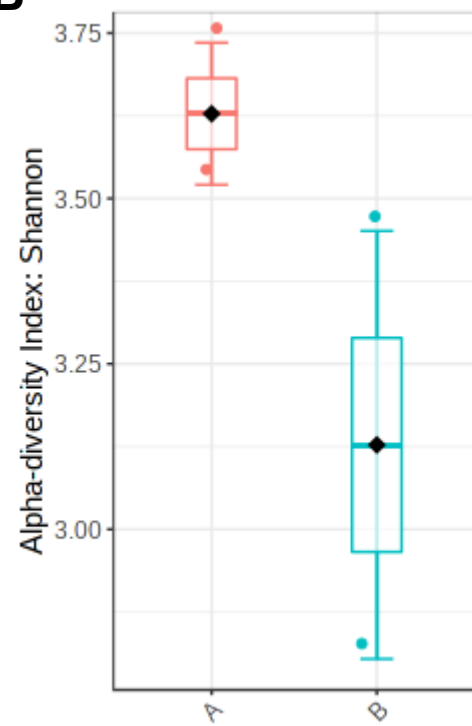

Alpha-diversity Index: Simpson

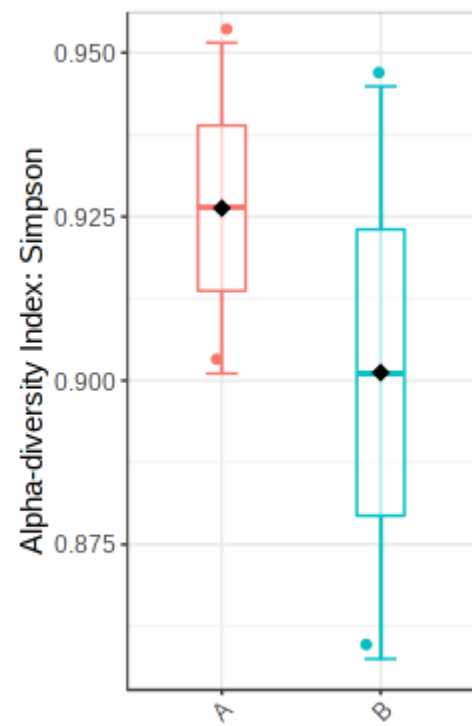

CLASS

A

B
